# Supplementary material for: A novel non-enzymatic hydrogen peroxide sensor based on poly-melamine film modified with platinum nanoparticles
Source: Royal Society of Chemistry journal article supplement (doi:10.1039/c4ra06925k), 2014-09-22
Supplement: c4ra06925k1.pdf [file c4ra06925k1.pdf]

## Supplementary information

### **A novel non-enzymatic hydrogen peroxide sensor based on poly-melamine film modified with platinum nanoparticles**

Sijing He, Zuanguang Chen\*, Yanyan Yu, Lijuan Shi

*School of Pharmaceutical Sciences, Sun Yat-sen University, Guangzhou 510006, China*

\*Corresponding author. Tel.: +86 20 3994 3044, Fax: +86 20 3994 3071

E-mail address: [chenzg@mail.sysu.edu.cn](mailto:chenzg@mail.sysu.edu.cn)

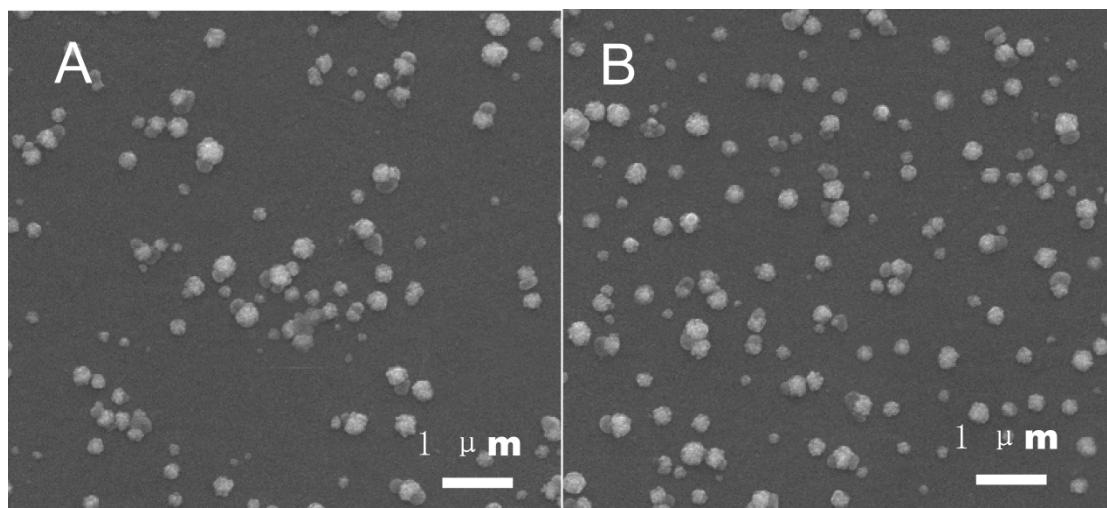

Fig. S1 SEM images of PtNPs/GCE (A) and PtNPs/poly-melamine/GCE (B).
